# Supplementary material
Source: Springer Nature journal article supplement (https://www.springermedizin.de/resource/supplementary/12865_2006_116_MOESM2_ESM.pdf/9428586)
Supplement: MOESM2 [file 9428586]

A.

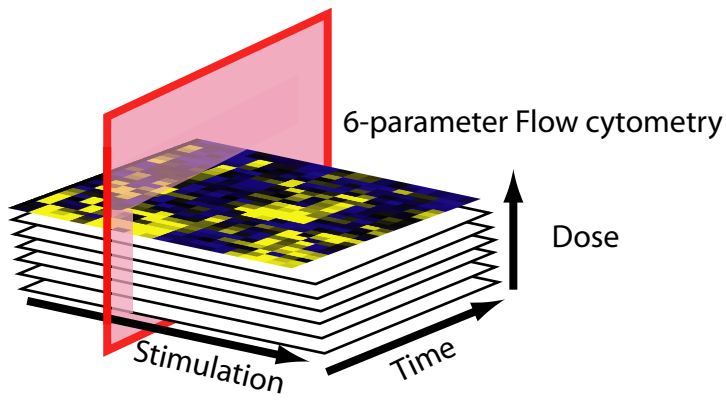

Analysis

- Dose-response curves
- Kinetic response curves
- Stimulation profile comparison

Stimulation specific difference in phospho activation profile  
Time= 5 min

B.

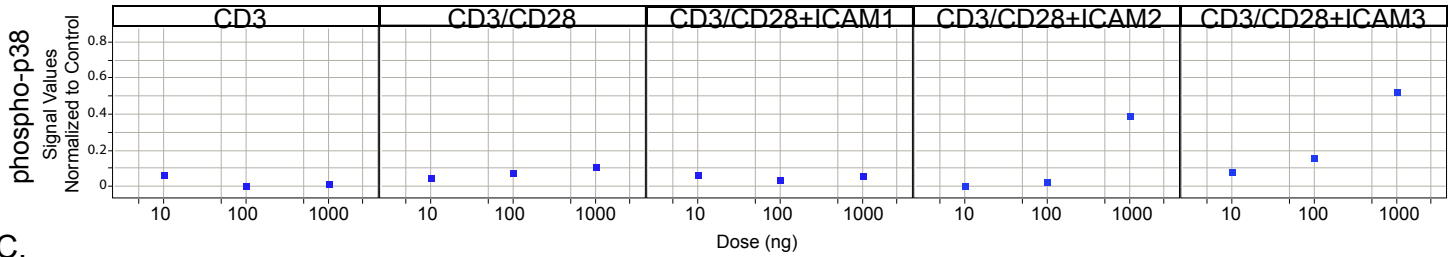

C.

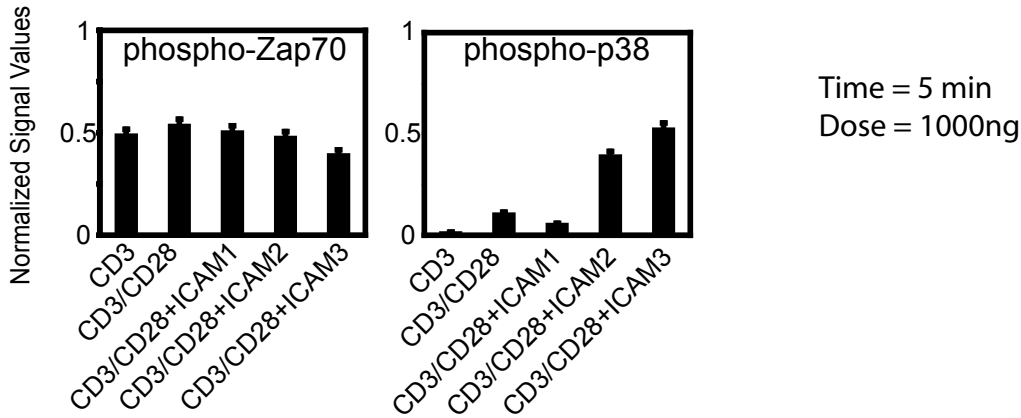

D.

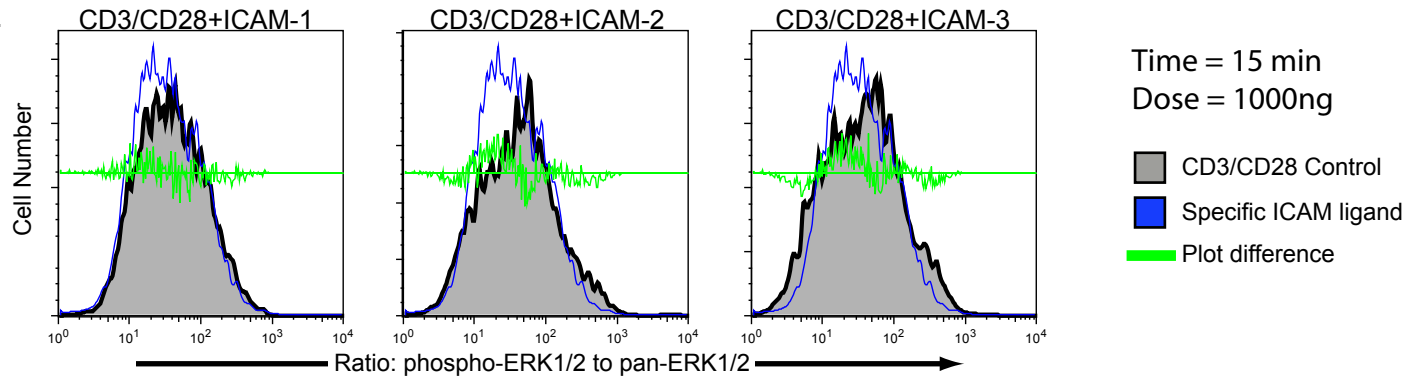

| Subset: CD3+CD4+         | pERK/panERK |
|--------------------------|-------------|
| Max. Difference          | 0.0478      |
| Value of Max. Difference | 39.242      |
| K/S Confidence           | >99.9%      |
| ChiSquared               | 0.0142      |
| ChiSquared T             | 3.8444      |
| %Positive                | 4.7791      |
| SED %Positive            | 9.9969      |

| Subset: CD3+CD4+         | pERK/panERK |
|--------------------------|-------------|
| Max. Difference          | 0.0854      |
| Value of Max. Difference | 43.714      |
| K/S Confidence           | >99.9%      |
| ChiSquared               | 0.0526      |
| ChiSquared T             | 34.696      |
| %Positive                | 8.5355      |
| SED %Positive            | 14.811      |

| Subset: CD3+CD4+         | pERK/panERK |
|--------------------------|-------------|
| Max. Difference          | 0.066       |
| Value of Max. Difference | 8.3536      |
| K/S Confidence           | >99.9%      |
| ChiSquared               | 0.0638      |
| ChiSquared T             | 43.575      |
| %Positive                | 5.1492      |
| SED %Positive            | 8.2985      |
